# Supplementary material for: Differences in meristem size and expression of branching genes are associated with variation in panicle phenotype in wild and domesticated African rice
Source: PubMed Central journal article supplement (PMC5273837; doi:10.1186/s13227-017-0065-y), 2017-01-28

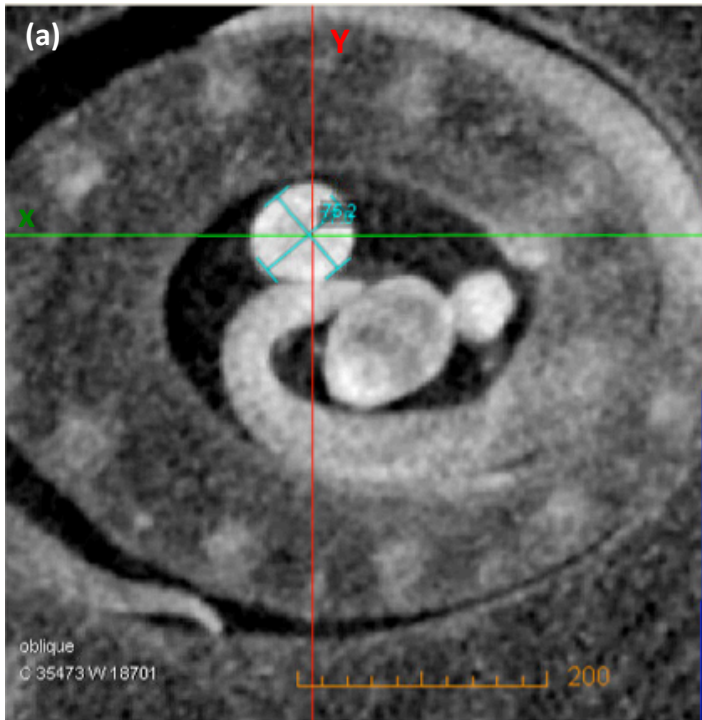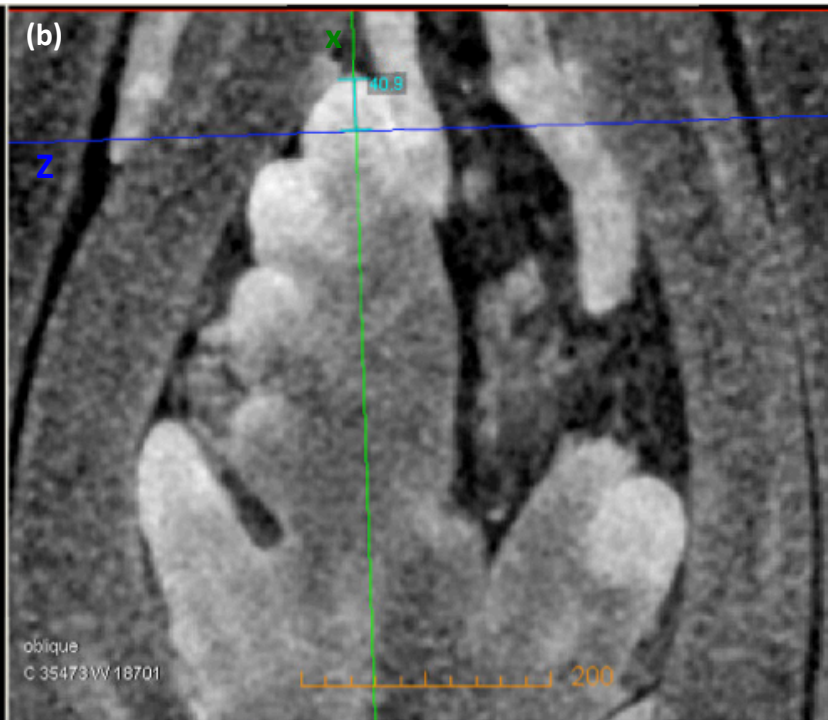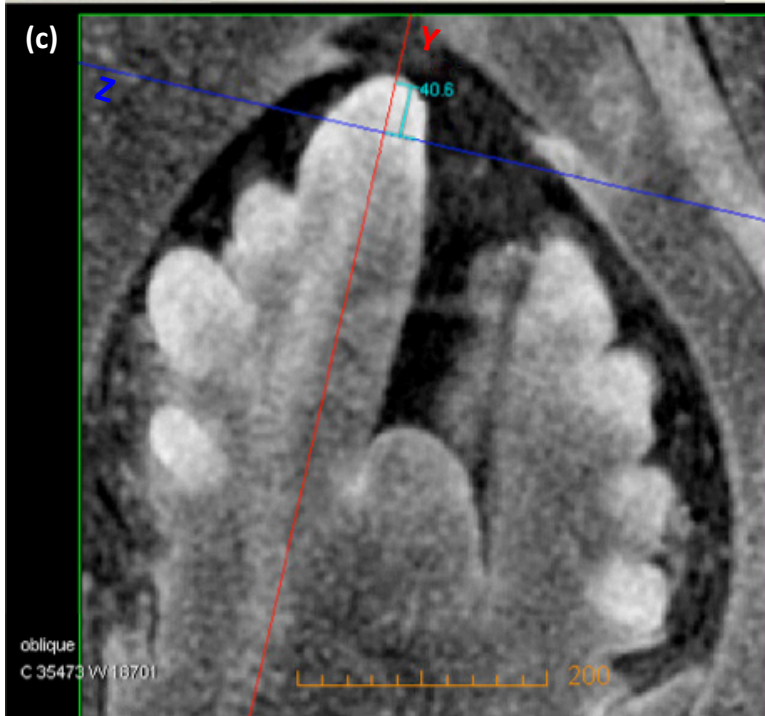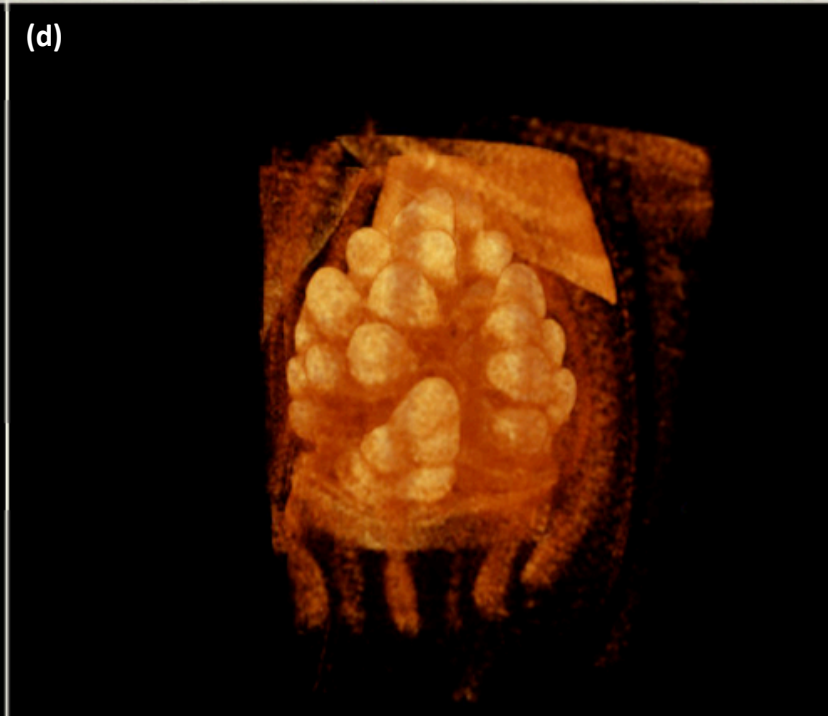

Supplement: 13227_2017_65_MOESM2_ESM.pdf [file 13227_2017_65_MOESM2_ESM.pdf]
